# Supplementary material for: Heterovalent cations substitution to design asymmetric chalcogenides with promising nonlinear optical performances
Source: Royal Society of Chemistry journal article supplement (doi:10.1039/d1tc01806j), 2021-01-01
Supplement: d1tc01806j1.pdf [file d1tc01806j1.pdf]

## *Supporting Information*

### **Heterovalent cations substitution to design asymmetric chalcogenides with promising nonlinear optical performances**

Ya -Nan Li, Zi-Xia Chen, Wen-Dong Yao, Ru-Ling Tang\* and Sheng-Ping Guo\*

*School of Chemistry and Chemical Engineering, Yangzhou University, Yangzhou, Jiangsu*

*225002, P. R. China*

*Corresponding author: rltang@yzu.edu.cn, spguo@yzu.edu.cn*

#### **CONTENTS**

##### **1. Tables and Figures**

**Table S1.** Atom coordinates and equivalent isotropic displacement parameters of **1** and **2**.

**Table S2.** Important bond lengths (Å) for **1** and **2**.

**Table S3.** Calculated bond valences for **1** and **2**.

**Table S4.** Comparison of NLO properties about a series compounds of  $AM^{\text{II}}M^{\text{IV}}Q_4$ .

**Figure S1.** Experimental and simulated powder X-ray diffraction patterns of **1** and **2**.

**Figure S2.** DSC curves of **1** (a) and **2** (b).

**Figure S3.** FT-IR spectra for **1** and **2**.

**Figure. S4.** (a) The overall structure of  $BaZnGeSe_4$  and the chain structure of  $BaZnGeSe_4$ . (b) Structure of  $\beta$ - $BaHgSnS_4$  viewed along the  $c$  direction and view of one  $_{\infty}[Hg-Sn-S]$  layer along  $a$ -axis.

**Figure S5.** The calculated band structure for **1** and **2**. The Fermi level is chosen at 0 eV.

**Figure S6.** Calculated real parts of the optical dielectric functions for **1** and **2**.

**Figure S7.** The calculated DOS for **1** and **2**. The Fermi level is chosen at 0 eV.

**Figure S8.** Calculated imaginary parts of the optical dielectric functions for **1** and **2**.

**Figure S9.** Calculated wavelength-dependent birefringence  $\Delta n$  for **1** and **2**.

**Table S1.** Atomic coordinates ( $\times 10^4$ ) and equivalent isotropic displacement parameters ( $U_{\text{eq}}^a$ ,  $\text{\AA}^2 \times 10^3$ ) for **1** and **2**.

| Atom              | Wyck. site  | $x$        | $y$        | $z$        | $U_{\text{eq}}/\text{\AA}^2$ |
|-------------------|-------------|------------|------------|------------|------------------------------|
| <b>Compound 1</b> |             |            |            |            |                              |
| Ba(1)             | 16 <i>b</i> | 7493.6(3)  | 4982.6(2)  | -622.7(11) | 13.1(2)                      |
| Ba(2)             | 8 <i>a</i>  | 7500       | 2500       | -616.9(11) | 12.8(2)                      |
| Ba(3)             | 8 <i>a</i>  | 7500       | 2500       | 4361.1(12) | 12.8(2)                      |
| Sn(1)             | 16 <i>b</i> | 5699.7(4)  | 3749.4(4)  | 9765.4(5)  | 11.58(19)                    |
| Sn(2)             | 16 <i>b</i> | 6127.9(4)  | 3755.9(4)  | 4371.8(4)  | 10.83(18)                    |
| Zn(1)             | 16 <i>b</i> | 6392.0(6)  | 3746.6(6)  | 6850.9(10) | 16.5(3)                      |
| Zn(2)             | 16 <i>b</i> | 6769.7(6)  | 3751.9(7)  | 1505.0(9)  | 15.1(3)                      |
| S(1)              | 16 <i>b</i> | 7043.2(12) | 3759.1(19) | 3263(2)    | 12.2(7)                      |
| S(2)              | 16 <i>b</i> | 7781.1(11) | 3741.5(18) | 678(2)     | 12.6(5)                      |
| S(3)              | 16 <i>b</i> | 6244.8(12) | 4573.4(15) | 10608(3)   | 12.2(10)                     |
| S(4)              | 16 <i>b</i> | 5481.7(12) | 3742.0(16) | 7952(2)    | 12.3(5)                      |
| S(5)              | 16 <i>b</i> | 7183.4(11) | 3739(2)    | 8072(2)    | 15.0(6)                      |
| S(6)              | 16 <i>b</i> | 6241.4(13) | 2928.8(15) | 625(3)     | 13.2(10)                     |
| S(7)              | 16 <i>b</i> | 6244.4(13) | 2931.6(15) | 5599(3)    | 13.7(11)                     |
| S(8)              | 16 <i>b</i> | 6256.2(13) | 4569.8(15) | 5622(3)    | 12.4(10)                     |
| <b>Compound 2</b> |             |            |            |            |                              |
| Ba(1)             | 8 <i>a</i>  | 5000       | 5000       | 2601(3)    | 12.8(4)                      |
| Ba(2)             | 8 <i>a</i>  | 7500       | 2500       | 5090(3)    | 12.8(4)                      |
| Ba(3)             | 16 <i>b</i> | 4998.7(5)  | 2481.9(3)  | 2601(2)    | 13.8(4)                      |
| Se(1)             | 16 <i>b</i> | 5427.9(8)  | 3739.1(16) | 3725.6(15) | 10.4(5)                      |
| Sn(1)             | 16 <i>b</i> | 6356.2(6)  | 3744.8(7)  | 2592.9(11) | 9.7(3)                       |
| Zn(1)             | 16 <i>b</i> | 8617.0(10) | 3743.0(11) | 7624(2)    | 19.1(6)                      |
| Sn(2)             | 16 <i>b</i> | 6804.9(6)  | 3750.7(6)  | 7180.9(11) | 12.4(3)                      |

|       |     |            |            |            |         |
|-------|-----|------------|------------|------------|---------|
| Se(2) | 16b | 4706.8(8)  | 3762.0(15) | 6328.6(16) | 14.5(4) |
| Zn(2) | 16b | 5725.2(10) | 3744.8(11) | 5484.8(17) | 14.9(5) |
| Se(3) | 16b | 3740.6(10) | 4586.4(14) | 3829(2)    | 12.7(7) |
| Se(4) | 16b | 7835.6(7)  | 3741.4(17) | 6352.7(16) | 11.4(4) |
| Se(5) | 16b | 6253.9(9)  | 2905.5(14) | 6354(2)    | 12.5(7) |
| Se(6) | 16b | 6250.3(10) | 4590.0(14) | 6329(2)    | 12.1(7) |
| Se(7) | 16b | 3748.9(10) | 2908.3(14) | 3858(2)    | 12.4(7) |
| Se(8) | 16b | 4542.9(9)  | 3738.6(15) | 1532.5(15) | 12.9(5) |

---

<sup>a</sup> $U_{\text{eq}}$  is defined as one third of the trace of the orthogonalized  $U_{ij}$  tensor.

**Table S2.** Important bond lengths (Å) for **1** and **2**

| <b>Bond</b>       | <b>Dist./Å</b> | <b>Bond</b>   | <b>Dist./Å</b> |
|-------------------|----------------|---------------|----------------|
| <b>Compound 1</b> |                |               |                |
| Ba(1)–S(1)#1      | 3.249(4)       | Ba(3)–S(8)#4  | 3.254(3)       |
| Ba(1)–S(2)        | 3.236(4)       | Ba(3)–S(8)#9  | 3.254(3)       |
| Ba(1)–S(3)#2      | 3.223(3)       | Sn(1)–S(3)    | 2.398(3)       |
| Ba(1)–S(4)#3      | 3.238(3)       | Sn(1)–S(4)    | 2.350(3)       |
| Ba(1)–S(5)#2      | 3.253(4)       | Sn(1)–S(5)#11 | 2.404(2)       |
| Ba(1)–S(6)#4      | 3.235(3)       | Sn(1)–S(6)#10 | 2.399(3)       |
| Ba(1)–S(7)#3      | 3.259(3)       | Sn(2)–S(1)    | 2.413(2)       |
| Ba(1)–S(8)#1      | 3.258(3)       | Sn(2)–S(2)#11 | 2.363(2)       |
| Ba(2)–S(2)#5      | 3.231(4)       | Sn(2)–S(7)    | 2.396(4)       |
| Ba(2)–S(3)#6      | 3.254(3)       | Sn(2)–S(8)    | 2.401(4)       |
| Ba(2)–S(3)#7      | 3.254(3)       | Zn(1)–S(4)    | 2.399(3)       |
| Ba(2)–S(5)#8      | 3.252(4)       | Zn(1)–S(5)    | 2.297(3)       |
| Ba(2)–S(5)#2      | 3.252(4)       | Zn(1)–S(7)    | 2.409(4)       |
| Ba(2)–S(6)#5      | 3.259(3)       | Zn(1)–S(8)    | 2.400(4)       |
| Ba(3)–S(1)#5      | 3.238(4)       | Zn(2)–S(1)    | 2.309(3)       |
| Ba(3)–S(4)#9      | 3.248(3)       | Zn(2)–S(2)    | 2.406(2)       |
| Ba(3)–S(4)#4      | 3.248(3)       | Zn(2)–S(3)#2  | 2.405(4)       |
| Ba(3)–S(7)#5      | 3.253(3)       | Zn(2)–S(6)    | 2.401(4)       |

**Compound 2**

|               |          |                |          |
|---------------|----------|----------------|----------|
| Ba(1)–Se(1)#1 | 3.362(4) | Ba(3)–Se(2)    | 3.340(3) |
| Ba(1)–Se(3)#1 | 3.369(3) | Sn(1)–Se(1)    | 2.549(2) |
| Ba(1)–Se(7)#2 | 3.356(3) | Zn(2)–Se(1)    | 2.414(3) |
| Ba(1)–Se(7)#3 | 3.356(3) | Sn(1)–Se(2)#2  | 2.498(2) |
| Ba(1)–Se(8)   | 3.351(3) | Sn(1)–Se(3)#2  | 2.532(3) |
| Ba(1)–Se(8)#1 | 3.350(3) | Sn(1)–Se(7)#2  | 2.531(3) |
| Ba(2)–Se(2)#2 | 3.331(3) | Zn(1)–Se(3)#7  | 2.505(4) |
| Ba(2)–Se(2)#4 | 3.331(3) | Zn(1)–Se(4)    | 2.416(3) |
| Ba(2)–Se(4)#5 | 3.359(4) | Zn(1)–Se(7)#7  | 2.516(4) |
| Ba(2)–Se(5)#5 | 3.363(3) | Zn(1)–Se(8)#7  | 2.513(3) |
| Ba(2)–Se(6)#4 | 3.371(3) | Sn(2)–Se(4)    | 2.540(2) |
| Ba(2)–Se(6)#2 | 3.371(3) | Sn(2)–Se(5)    | 2.525(3) |
| Ba(3)–Se(1)   | 3.356(4) | Sn(2)–Se(6)    | 2.533(3) |
| Ba(3)–Se(2)#6 | 3.351(3) | Sn(2)–Se(8)#8  | 2.500(3) |
| Ba(3)–Se(3)#2 | 3.378(3) | Zn(2)–Se(2)    | 2.524(2) |
| Ba(3)–Se(4)#4 | 3.349(4) | Zn(2)–Se(5)    | 2.516(4) |
| Ba(3)–Se(5)#6 | 3.354(3) | Zn(2)–Se(6)    | 2.508(4) |
| Ba(3)–Se(6)#4 | 3.340(3) | Zn(1)–Se(3)#12 | 2.504(4) |
| Ba(3)–Se(7)   | 3.379(3) |                |          |

---

Symmetry transformations used to generate equivalent atoms for **1**: #1  $3/2-y, 1-y, -1/2+z$ ; #2  $+x, +y, -1+z$ ; #3  $5/4-x, 1/4+y, -3/4+z$ ; #4  $1/4+x, 3/4-y, -1/4+z$ ; #5  $3/2-x, 1/2-y, +z$ ; #6  $5/4-x, -1/4+y, -5/4+z$ ; #7  $1/4+x, 3/4-y, -5/4+z$ ; #8  $3/2-x, 1/2-y, -1+z$ ; #9  $5/4-x, -1/4+y, -1/4+z$ ; #10  $+x, +y, 1+z$ ; #11  $-1/4+x, 3/4-y, 1/4+z$ .

Symmetry transformations used to generate equivalent atoms for **2**: #1  $1-x, 1-y, +z$ ; #2  $1/4+x, 3/4-$

$y, -1/4+z$ ; #3  $3/4-x, 1/4+y, -1/4+z$ ; #4  $5/4-x, -1/4+y, -1/4+z$ ; #5  $3/2-x, 1/2-y, +z$ ; #6  $1-x, 1/2-y, -1/2+z$ ; #7  $1/2+x, +y, 1/2+z$ ; #8  $1/4+x, 3/4-y, 3/4+z$ ; #12  $-1/2+x, +y, -1/2+z$ ;

**Table S3.** Calculated bond valences for **1** and **2**.

| Atom              | bond valence | Atom              | bond valence |
|-------------------|--------------|-------------------|--------------|
| <b>Compound 1</b> |              | <b>Compound 2</b> |              |
| Ba(1)             | 2.216        | Ba(1)             | 2.191        |
| Ba(2)             | 2.187        | Ba(2)             | 2.211        |
| Ba(3)             | 2.191        | Ba(3)             | 2.214        |
| Zn(1)             | 1.859        | Zn(1)             | 1.955        |
| Zn(2)             | 1.835        | Zn(2)             | 1.940        |
| Sn(1)             | 4.059        | Sn(1)             | 3.964        |
| Sn(2)             | 4.002        | Sn(2)             | 3.997        |
| S(1)              | 2.055        | Se(1)             | 2.075        |
| S(2)              | 2.080        | Se(2)             | 2.384        |
| S(3)              | 1.972        | Se(3)             | 2.237        |
| S(4)              | 2.111        | Se(4)             | 2.377        |
| S(5)              | 2.083        | Se(5)             | 2.268        |
| S(6)              | 1.963        | Se(6)             | 2.251        |
| S(7)              | 1.949        | Se(7)             | 2.210        |
| S(8)              | 1.946        | Se(8)             | 2.370        |

**Table S4.** NLO properties about a series compounds of  $AM^{\text{II}}M^{\text{IV}}Q_4$ .

| Compound                      | Space group | $a$ (Å) | $b$ (Å) | $c$ (Å) | Band gap (eV) | SHG ( $\times$ AGS)             | LIDT | $\Delta n$ |
|-------------------------------|-------------|---------|---------|---------|---------------|---------------------------------|------|------------|
| SrCdGeS <sub>4</sub>          | <i>Ama2</i> | 10.3325 | 10.2335 | 6.4408  | 2.60          | 2.0                             | /    | /          |
| SrCdGeSe <sub>4</sub>         | <i>Ama2</i> | 10.8245 | 10.6912 | 6.6792  | 1.90          | 5.0                             | /    | /          |
| SrHgSnS <sub>4</sub>          | <i>Ama2</i> | 10.4072 | 10.4873 | 6.5578  | 2.72          | 1.9                             | /    | /          |
| SrHgGeS <sub>4</sub>          | <i>Ama2</i> | 10.838  | 10.746  | 6.638   | 2.42          | 4.8                             | /    | /          |
| BaZnSiSe <sub>4</sub>         | <i>Ama2</i> | 11.3055 | 11.2344 | 6.1994  | 2.71          | 1/3                             | /    | /          |
| BaZnGeSe <sub>4</sub>         | <i>Ama2</i> | 11.3255 | 11.2527 | 6.2917  | 2.46          | 1.0                             | /    | /          |
| BaHgGeSe <sub>4</sub>         | <i>Ama2</i> | 11.255  | 11.033  | 6.6847  | 2.49          | 4.7                             | /    | /          |
| $\beta$ -BaHgSnS <sub>4</sub> | <i>Ama2</i> | 10.8450 | 10.8042 | 6.6178  | 2.77          | 2.8                             | /    | /          |
| SrZnSnS <sub>4</sub>          | <i>Fdd2</i> | 12.6336 | 20.9242 | 20.8591 | 2.83          | 1.0 $\times$ LiGaS <sub>2</sub> | /    | /          |
| SrCdSnS <sub>4</sub>          | <i>Fdd2</i> | 20.9017 | 21.0626 | 13.0676 | 2.05          | 1.3                             | 0.22 | 10AGS      |
| SrCdSnSe <sub>4</sub>         | <i>Fdd2</i> | 21.8908 | 21.8945 | 13.5407 | 1.54          | 1.5                             | 0.33 | 5AGS       |
| SrHgSnSe <sub>4</sub>         | <i>Fdd2</i> | 21.9027 | 21.9059 | 13.5010 | 2.07          | 5.0                             | /    | /          |
| BaCdSnS <sub>4</sub>          | <i>Fdd2</i> | 21.566  | 21.760  | 13.110  | 2.30          | 0.7                             | /    | /          |
| BaCdSnSe <sub>4</sub>         | <i>Fdd2</i> | 22.381  | 22.711  | 13.588  | 1.79          | 1.6                             | /    | /          |
| BaMnSnS <sub>4</sub>          | <i>Fdd2</i> | 21.547  | 21.796  | 12.981  | 1.90          | 1.2                             | 0.17 | 10AGS      |
| BaCdGeS <sub>4</sub>          | <i>Fdd2</i> | 21.285  | 21.691  | 12.786  | 2.58          | 0.3                             | 0.15 | 13AGS      |
| BaHgSnSe <sub>4</sub>         | <i>Fdd2</i> | 22.441  | 22.760  | 13.579  | 1.98          | 5.0                             | /    | /          |
| BaZnSnS <sub>4</sub>          | <i>Fdd2</i> | 21.398  | 21.865  | 12.707  | 3.25          | 0.6                             | 0.17 | 5.7AGS     |
| BaZnSnSe <sub>4</sub>         | <i>Fdd2</i> | 22.240  | 22.705  | 13.197  | 1.88          | 1.0                             | 0.26 | 9.8AGS     |

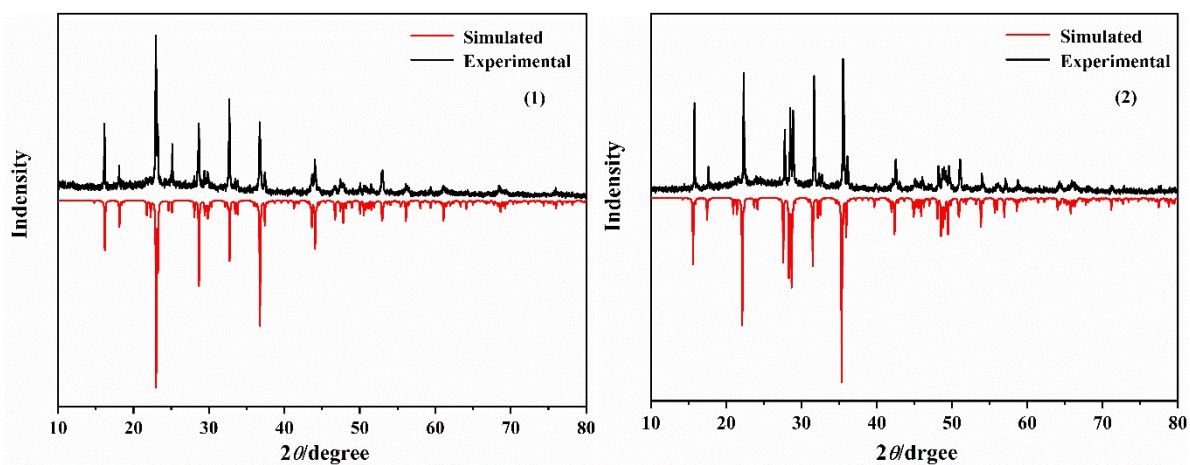

Figure S1. Powder XRD patterns for 1 and 2.

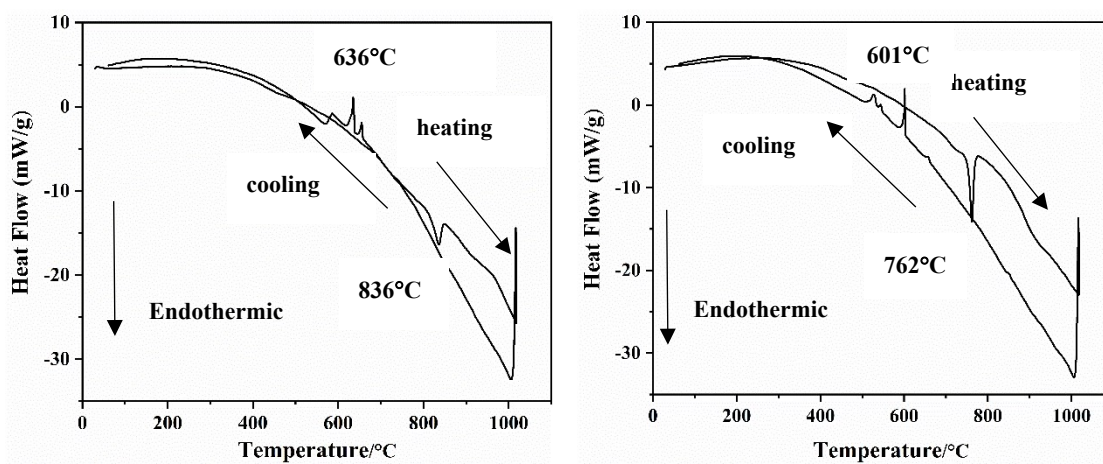

Figure S2. DSC curves of 1 (a) and 2 (b).

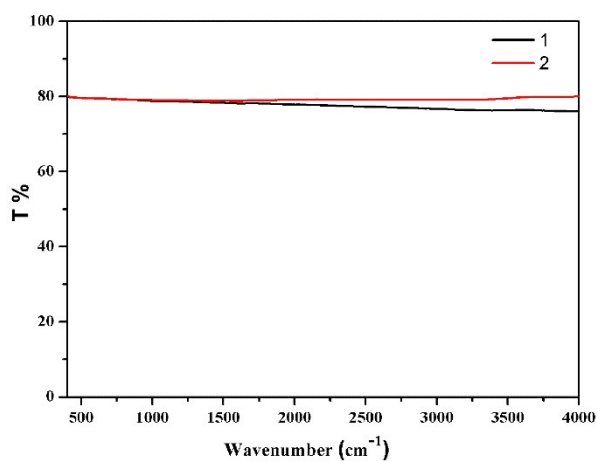

Figure S3. FT-IR spectra for 1 and 2.



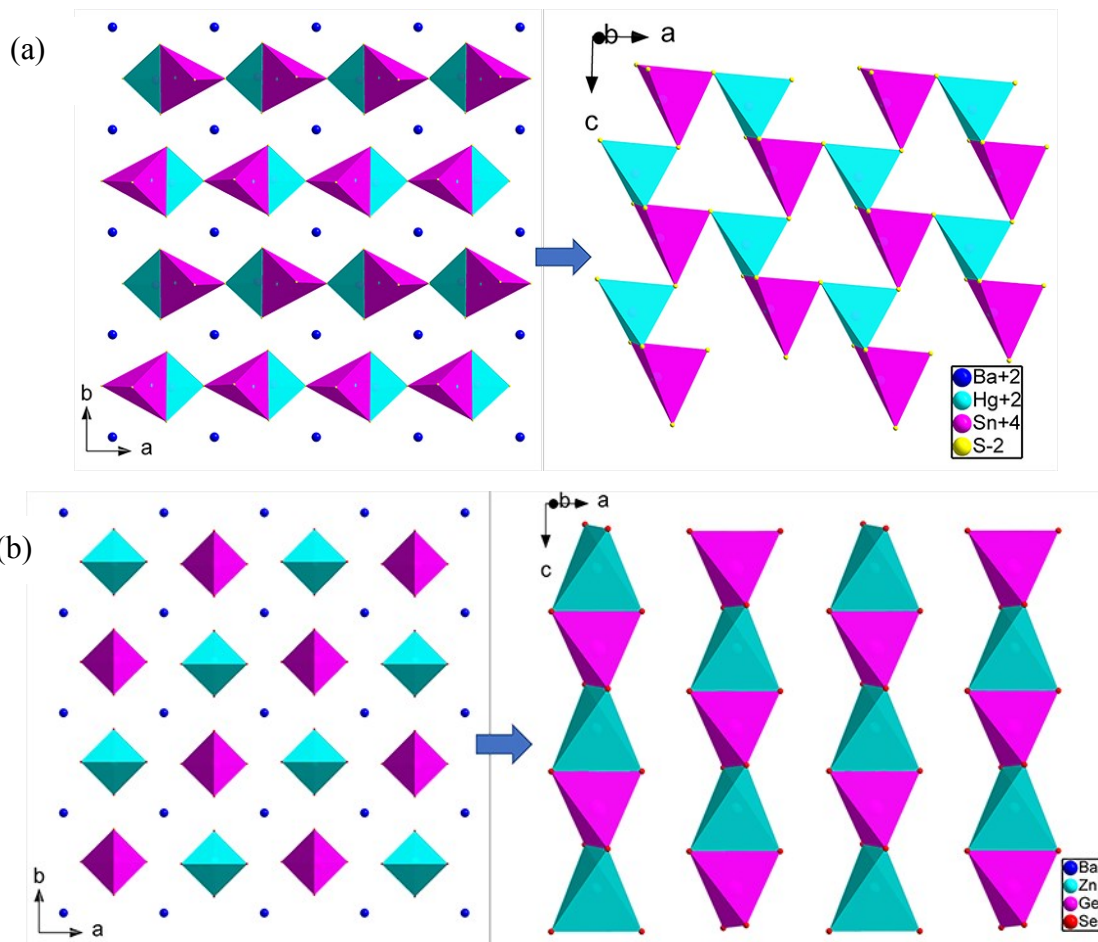

**Figure S4.** (a) The overall structure of BaZnGeSe<sub>4</sub> and the chain structure of BaZnGeSe<sub>4</sub>. (b) Structure of β-BaHgSnS<sub>4</sub> viewed along the *c* direction and view of one ∞[Hg–Sn–S] layer along the *a* direction.

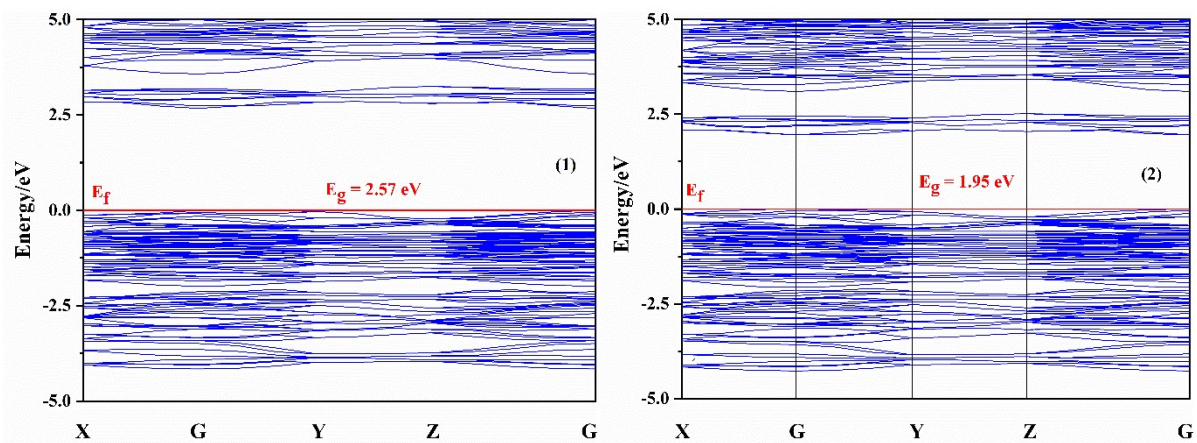

**Figure S5.** The calculated band structures for **1** and **2**. The Fermi level is chosen at 0 eV.

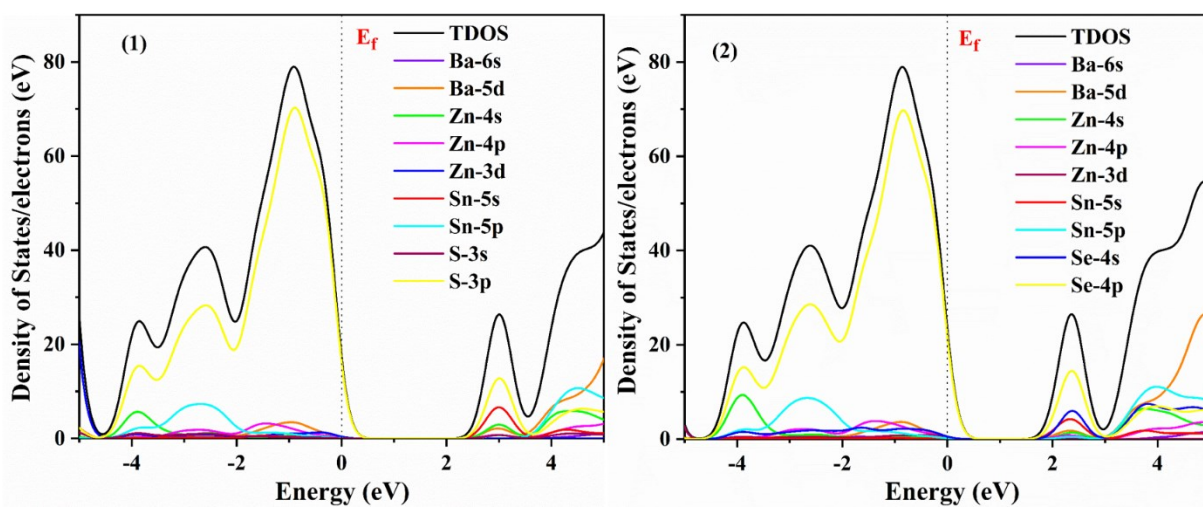

**Figure S6.** The calculated DOS for **1** and **2**. The Fermi level is chosen at 0 eV.

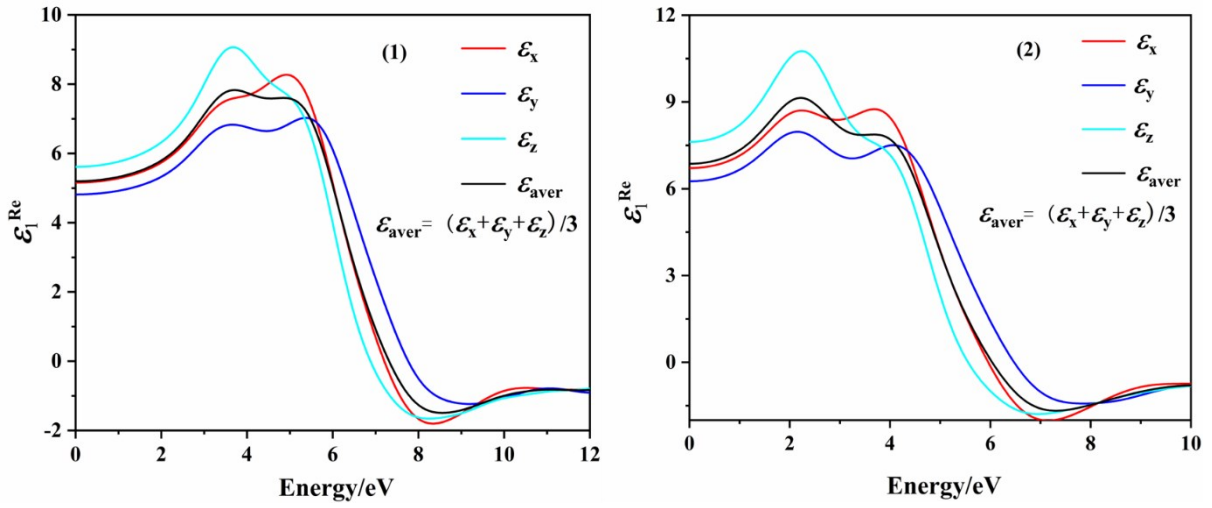

**Figure S7.** Calculated real parts of the optical dielectric functions for **1** and **2**.

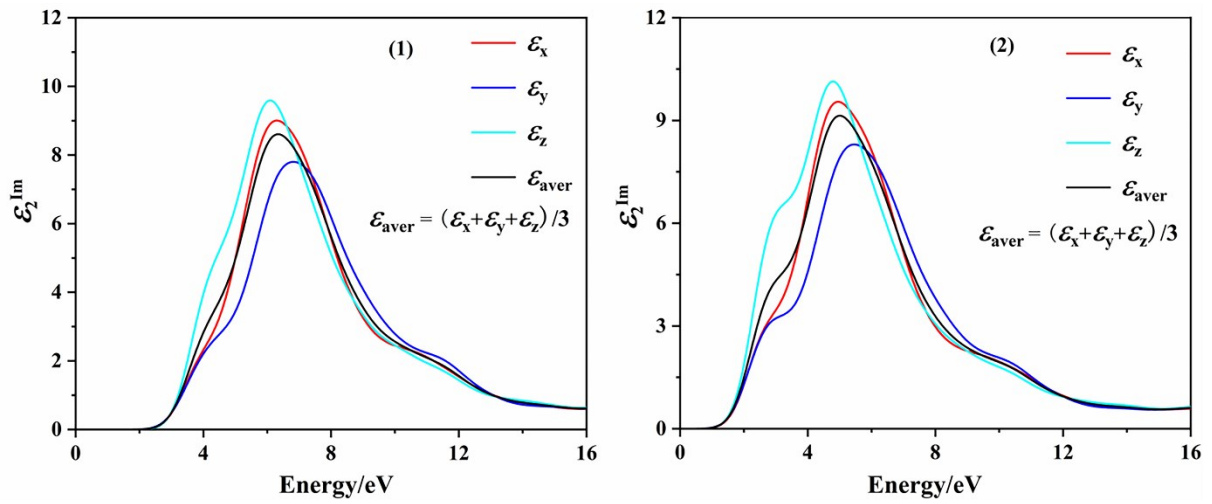

**Figure S8.** Calculated imaginary parts of the optical dielectric functions for **1** and **2**.

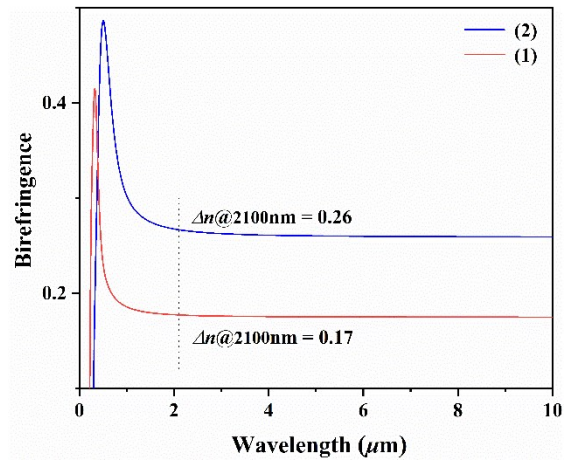

**Figure S9.** Calculated wavelength-dependent birefringence  $\Delta n$  for **1** and **2**.
